# A nanometer difference in myofilament lattice spacing of two cockroach leg muscles explains their different functions

Travis Carver Tune<sup>1</sup>, Weikang Ma<sup>2</sup>, Thomas C. Irving<sup>2</sup>, Simon Sponberg<sup>1,3,\*</sup>

\*For correspondence:  
[sponberg@gatech.edu](mailto:sponberg@gatech.edu)

<sup>1</sup>School of Physics, Georgia Institute of Technology, Atlanta, GA, 30332 USA; <sup>2</sup>BioCAT and CSRR, Department of Biological Sciences, Illinois Institute of Technology, Chicago, IL, 60616 USA; <sup>3</sup>School of Biological Sciences, Georgia Institute of Technology, Atlanta, GA, 30332 USA

## Abstract

Muscle is highly organized across scales. Consequently, small changes in arrangement of myofilaments can influence macroscopic function. Two leg muscles of a cockroach, have identical innervation, mass, twitch responses, length-tension curves, and force-velocity relationships. However, during running, one muscle is dissipative, while the other produces significant positive mechanical work. Using time resolved x-ray diffraction in intact, contracting muscle, we simultaneously measured the myofilament lattice spacing, packing structure, and macroscopic force production of these muscle to test if nanoscale differences could account for this conundrum. While the packing patterns are the same, one muscle has 1 nm smaller lattice spacing at rest. Under isometric activation, the difference in lattice spacing disappeared explaining the two muscles' identical steady state behavior. During periodic contractions, one muscle undergoes a 1 nm greater change in lattice spacing, which correlates with force. This is the first identified feature that can account for the muscles' different functions.

## Introduction

Many biological structures, especially tissues have hierarchical, multiscale organization (*McCulloch, 2016*). Of these, muscle is exceptional because it is also active: capable of producing internal stress based on the collective action of billions of myosin motors (*Maughan and Vigoreaux, 1999*). Muscle can perform many roles in organisms, acting like a motor, brake, or spring depending on the task required (*Josephson, 1985; Dickinson et al., 2000*). It is even possible for different parts of a single muscle to behave with different functions (*Roberts et al., 1997; George et al., 2013*). This energetic versatility enables muscle's diverse function in animal locomotion and behavior. Yet we still have a difficult time predicting function from multiscale properties.

Muscle function during locomotion is typically characterized through a work loop: a stress-strain (or force-length) curve in which the length (or strain) of the muscle is prescribed through a trajectory and electrically activated at specific points (phases) during the cycle of shortening and lengthening (*Josephson, 1985; Ahn, 2012*). The area inside the loop gives the net work done by the muscle and can be positive, negative, biphasic, or zero. Work loop parameters typically mimic *in vivo* or power maximizing conditions. Many physiological characterizations of muscle are

40 steady state in some respect – twitch responses are isometric, the length-tension curve is obtained  
41 under constant, usually tetanic activation, and even the force-velocity curve is taken as the force  
42 at constant activation during constant velocity shortening for a given load. These macroscopic  
43 properties arise from and, in fact, helped establish the crossbridge basis for muscle contraction and  
44 sliding filament theory (*Gordon et al., 1966; Huxley and Simmons, 1971*). Although these steady  
45 state macroscopic measurements are important determinants of muscle work loops, they are not  
46 sufficient to account for the variability of muscle work output and hence function under dynamic  
47 conditions (*Josephson, 1999*). The multiscale nature of muscle suggests that subtle differences in  
48 structure of the contractile apparatus at the micro to nanometer scale could also be playing an  
49 underappreciated role in determining differences in work output and hence macroscopic function.

50 Differences at the nanometer scale can have profound effects due to the arrangement of actin-  
51 containing thin filaments and myosin-containing thick filaments into a regular lattice with spacings  
52 on the scale of 10's of nanometers (*Millman, 1998*). This myofilament lattice inside each sarcomere  
53 is a crystal in cross section even under physiological conditions. As a result, its structure can be  
54 readily studied by x-ray diffraction even during force production and length changes (*Irving, 2006;*  
55 *Iwamoto, 2018*). The interfilament spacing within the lattice (lattice spacing) depends in part on the  
56 axial length of the muscle, stemming from the strain placed on the muscle fibers during contraction,  
57 as well as the radial tension (*Bagni et al., 1994*). Lattice spacing in turn is important for force  
58 development because it influences myosin binding probability and hence axial and radial force  
59 production (*Schoenberg, 1980; Williams et al., 2010; Tanner et al., 2007, 2012*). Lattice spacing  
60 changes in muscle independent of sarcomere length changes have been shown to enhance  $\text{Ca}^{2+}$   
61 sensitivity (shape of force-pCa curves) (*Fuchs and Wang, 1996*) and change crossbridge kinetics  
62 (*Adhikari et al. (2004)*). The change in lattice spacing even accounts for up to 50% of the force change  
63 due to length in a typical muscle's force-length curve (*Williams et al., 2013*). The filament lattice  
64 in muscle is not isovolumetric, indicating crossbridge attachment generates a radial force which  
65 corresponds to and is of the same order of magnitude as crossbridge axial force (*Bagni et al.,*  
66 *1994; Cecchi et al., 1990*). These studies all showed how lattice spacing could affect macroscopic  
67 properties of muscle, but the implications have so far only examined steady state or quasi-static  
68 conditions. However, significant variation in lattice spacing has been linked to crossbridge binding  
69 during work loops in isolated insect flight muscle where temperature was changed to affect both  
70 lattice spacing and work (*George et al., 2013*). What is still unknown is whether or not myofilament  
71 lattice structure (its packing arrangement and spacing) is a significant determinant of macroscopic  
72 work in the absence of other effects, and if differences in lattice structure result in a difference in  
73 muscle work in a manner functional for locomotion.

74 To explore these questions we looked for two very similar muscles that have unexplained  
75 differences in their work production. Two of the femoral extensors of the cockroach, *Blaberus*  
76 *discoidalis*, are ideal for exploring how multiscale mechanisms influence work (Figure 1a). These two  
77 muscles have the same submaximal and tetanic force-length curves, twitch response, force-velocity  
78 curve, phase of activation, force enhancement due to passive pre-stretch, and force depression  
79 due to active shortening (*Full et al., 1998; Ahn et al., 2006*). They are even innervated by the same  
80 single, fast-type motor neuron (*Becht and Dresden, 1956; Pearson and Iles, 1971*) and share the  
81 same synaptic transmission properties (*Becht et al., 1960*) meaning that both muscles are activated  
82 as a single motor unit in all conditions. To the best of our knowledge, these muscles share the same  
83 anatomical and steady state physiological properties. However, when the muscles are isolated and  
84 prescribed dynamic patterns of strain and activation which match those that the muscle experiences  
85 during *in vivo* running, one muscle acts like a brake with a dissipative work loop, while the other  
86 is more like a motor with a net positive, biphasic work loop (Figure 1b, work loops from *Ahn et al.*  
87 *(2006)*). Since the macroscopic properties that might determine muscle function are the same in  
88 these muscles, we cannot account for their differences in work output. It has been suggested,  
89 although not tested, that structural differences in the myofilament lattice may account for the  
90 differences (*Ahn et al., 2006*).

91 Critically any feature than could explain the differences in work output would not only have to  
92 explain the dynamic differences between the two muscles, but must also be identical in steady  
93 state in both muscles in order to account for their similarities. We explore two hypotheses using  
94 time-resolved x-ray diffraction measurements of muscle's nanometer structure and myofilament  
95 lattice spacing (Figure 1C) taken simultaneous with physiological force measurements in intact,  
96 contracting muscle (Figure 1D). First, we tested whether the lattice packing structure of the two  
97 muscles might be different. Actin and myosin vary in their ratio and the phase of their packing  
98 pattern across muscles (*Millman, 1998; Squire et al., 2005*). Different packing structures could  
99 produce different dynamics of force development by affecting myosin free energy. Second, we  
100 consider if the myofilament lattice spacing (Figure 1E) is systematically different in the two muscles  
101 thereby affecting work production. If any structural differences only exists under dynamic conditions  
102 (periodic contractions), then they could also lead to convergent steady state properties.

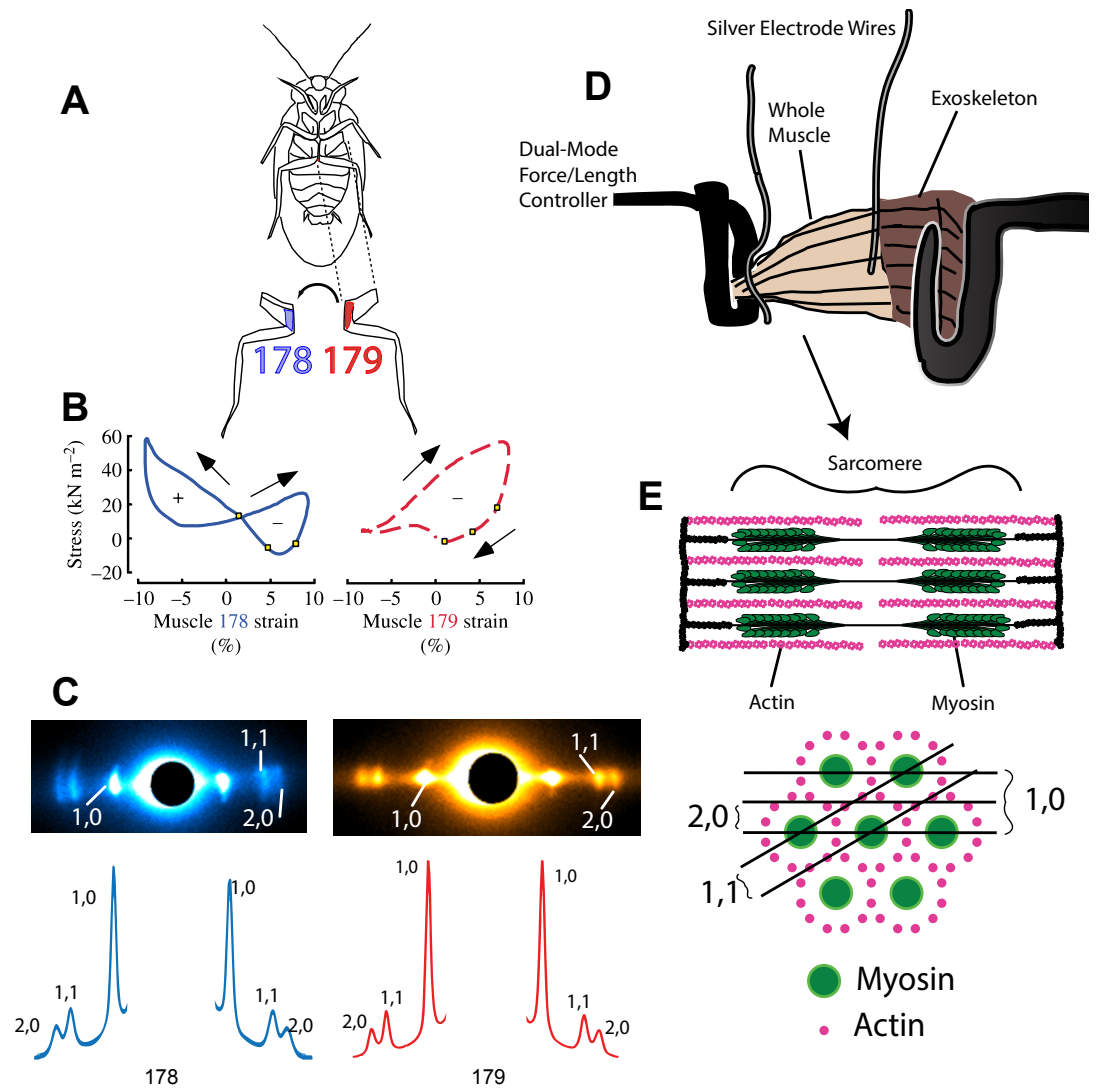

**Figure 1.** A) Ventral View of *Blaberus discoidalis* showing the hind-limb femoral extensors 178 and 179 (notation from [Carbonell \(1947\)](#)). B) Work loops performed on muscles 178 and 179 show a difference in function despite near identical steady state behavior (work loop figures from [Ahn et al. \(2006\)](#)). C) X-ray diffraction patterns from muscles 178 and 179 with the most prominent peaks labeled. Also shown, is the intensity profile along the equatorial axis. D) Diagram showing experimental set-up. X-ray beam path is perpendicular to the contraction axis. E) Multiscale hierarchy of muscle structure, showing a single sarcomere (1-10  $\mu\text{m}$ ) of a muscle (1-10 mm) and the sarcomere cross-section, with diffraction planes (10's of nm) corresponding to the peaks indicated in C. Spacing between diffraction planes in E is related by Bragg's Law to the spacing between peaks in C, while the intensity of peaks shown in C are related to the mass lying along depicted planes in E.

## 103 Results

### 104 Similarity in packing structure cannot explain functional differences

105 We first tested whether the two muscles had the same lattice packing structure (Figure 1E). In  
 106 invertebrates, there can be a wide variety of actin packing patterns. Two muscles with different  
 107 myosin-actin ratios and geometry might have similar steady state behavior since they have the  
 108 same number of myosin heads available for crossbridge binding, but could have different dynamic  
 109 behavior because of differences in actin availability. We can use the ratio ( $\frac{I_{11}}{I_{20}} = \frac{I_{11/20}}$ ) of intensity in  
 110 the (1,1) and (2,0) peaks (Figure 1, peaks labeled) to determine if muscles 178 and 179 have similar  
 111 packing patterns (see methods).

112 We measured the intensity of the (1,1) and (2,0) peaks of muscles 178 and 179 and found

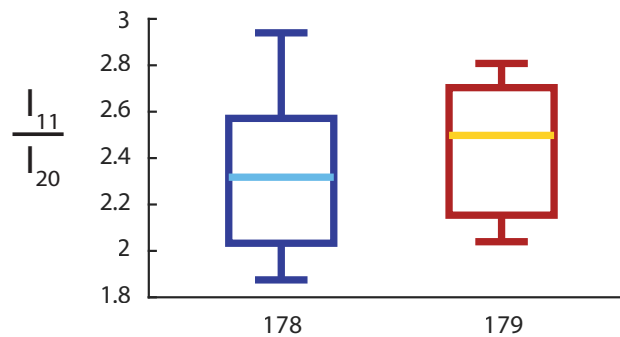

**Figure 2.** Boxplots of the intensity ratio  $I_{11/20}$  for muscles 178 ( $n=8$ , left) and 179 ( $n=9$ , right), with median and 25<sup>th</sup> and 75<sup>th</sup> percentiles. There is no significant difference between the two muscles' intensity ratios, indicating that they have same packing pattern ( $p = .44$ , Wilcoxon rank sum test).

113  $I_{11/20} = 2.47 \pm 0.4$  and  $I_{11/20} = 2.68 \pm 0.4$  for muscle 179 (mean and 95% confidence of mean) for  
114 muscles 178 and 179 respectively. We know from previous electron microscopy work that muscle  
115 137, the midlimb analog of 179, has a 6:1 packing pattern common among insect limb muscle  
116 (Jahromi and Atwood, 1969), so it is likely muscle 179 also has this packing pattern. Regardless,  
117 based on the intensity ratio of 178 compared to 179, we determined 178 to have the same structure  
118 as 179. Since the two muscles have the same packing structure, this alone cannot account for their  
119 different work loops.

### 120 **A 1 nm difference in lattice spacing under passive conditions disappears when** 121 **muscles are activated to steady state**

122 Since we did not observe a difference in packing structure between the two muscles, we next asked  
123 if the lattice spacing under isometric conditions differed between the two muscles. The distance  
124 between myosin planes is proportional to the lattice spacing  $d_{10}$ , which we can find by measuring  
125 the distance between the corresponding diffraction peaks,  $s_{10}$ , and using Bragg's Law,  $\lambda = 2d \frac{s}{L}$ ,  
126 where  $L$  is the sample to detector distance and  $\lambda$  is the wavelength of the x-ray. At each strain  
127 condition, we isometrically held the muscle and activated with a 3 spike stimulus, reflecting the 3  
128 spikes typical of submaximal activation in these muscles (Ahn et al., 2006). We used the value of  $d_{10}$   
129 at peak stress as the steady state active  $d_{10}$ .

130 At rest, passive 178 and 179 lattice spacings were different with 178 being  $1.01 \pm 0.41$  nm  
131 (mean  $\pm$  95% CI of the mean) smaller across all 5 strain conditions ( $p = .005$ ). When activated the  
132 myofilament lattice of muscle 178 expanded radially by about 1 nm across the entire strain range  
133 measured between passive and active conditions, while in 179 activation caused no statistically  
134 significant change in lattice spacing under any strain condition (Figure 3,  $p = 0.008$  and  $p = 0.52$ ,  
135 two-factor ANOVA, for 178 and 179 respectively). We also found that activated 178 and 179 lattice  
136 spacings were only  $.05 \text{ nm} \pm .4$  apart (mean  $\pm$  95% CI of the mean) and were not significantly  
137 different ( $p = 0.86$ ). Taken together, these measurements show a statistically significant difference  
138 between passive muscle 178 and 179, which disappears upon activation as 178's  $d_{10}$  increases to  
139 match 179's  $d_{10}$  which does not change.

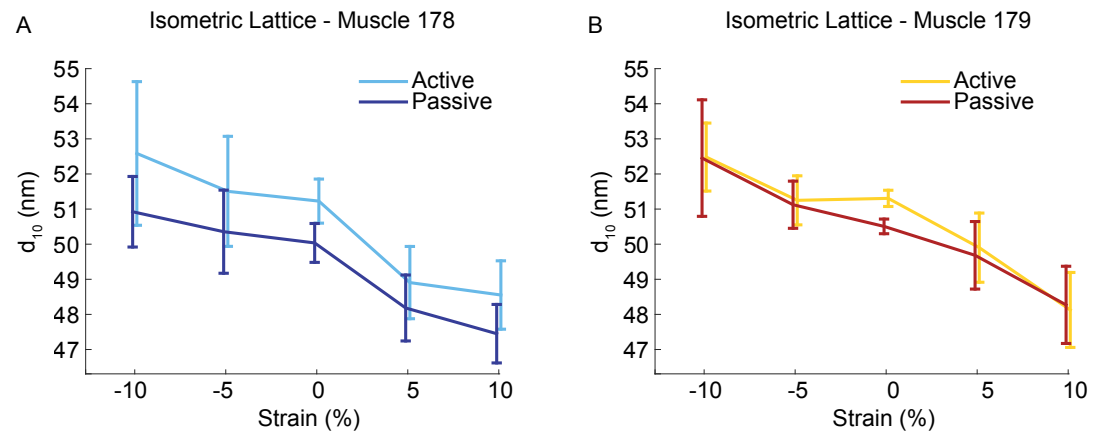

**Figure 3.** Muscle 178 (A) and 179 (B) passive and active  $d_{10}$  at strains of -10% to +10% of operating length, with 95% confidence of the mean. Sample size  $n$  at strains (-10,-5,0,5,10) was: (7,6,8,7,7) for muscle 178; (8,9,8,9,9) for muscle 179

### 140 **The two muscles have different lattice spacing dynamics**

141 While the isometric differences are informative concerning potential differences in stress develop-  
142 ment, we also needed to examine how lattice spacing behaves during dynamic contractions. We  
143 tested conditions similar to the those where *in vivo* work is being generated to compare to **Ahn**  
144 **et al. (2006)**. We measured  $d_{10}$  during passive work loops and work loops with the *in vivo* activation  
145 pattern and phase (see methods).

146 When activated, the time course of  $d_{10}$  in muscle 178 differed significantly in the active vs. the  
147 passive case, while 179 lattice spacing did not ( $p = .008$  and  $p = .11$ , two factor ANOVA, see Figure 4).  
148 In both muscles passive (unstimulated) muscle underwent comparable lattice spacing change.  
149 Activation produced additional lattice spacing expansion of  $1.1 \pm .5$  nm at the peak stress plateau.  
150 Peak lattice spacing change in muscle 179 was  $.4 \pm .4$  nm (see Figure 5 for a representative lattice  
151 spacing, stress, and incremental work timeseries).

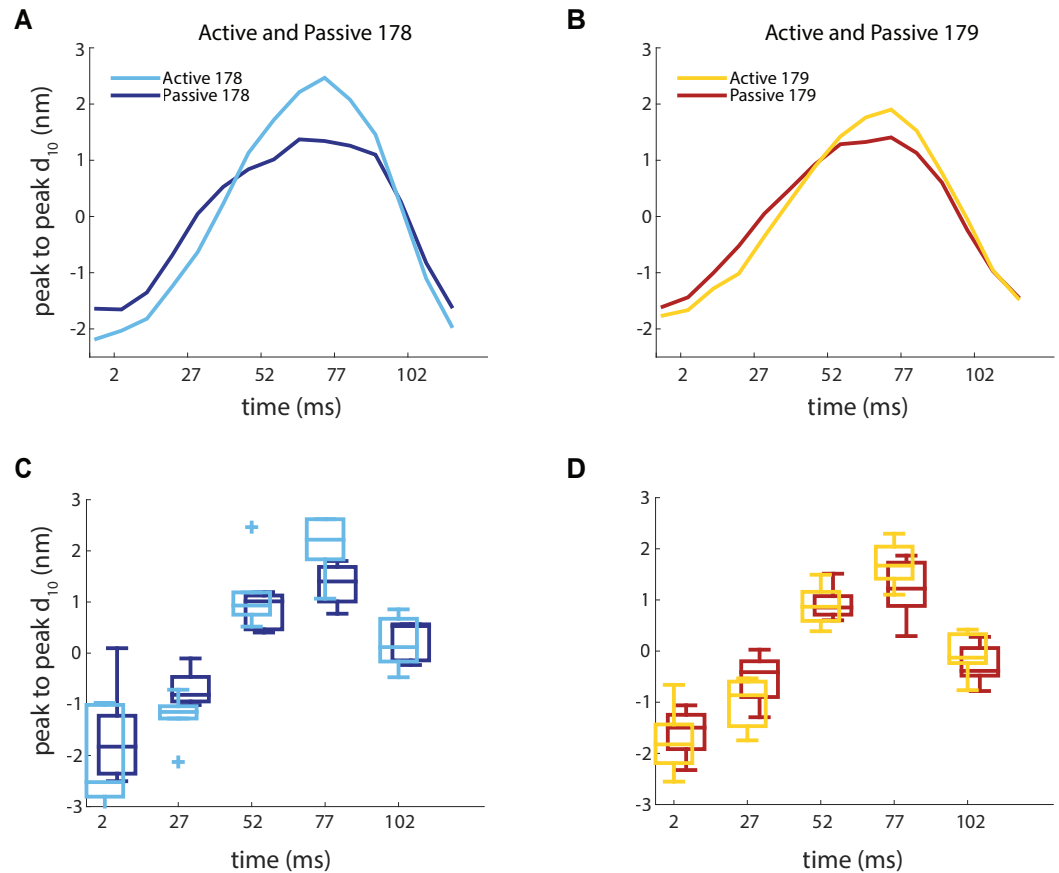

**Figure 4.** A) and B) show the mean subtracted active and passive  $d_{10}$  lattice spacing, respectively. These were obtained similarly to Figure 3, but under dynamic work loop conditions. C) and D) show the variation in the mean at times corresponding to  $.02T$ ,  $0.23T$ ,  $0.43T$ ,  $0.64T$ ,  $0.84T$ , which corresponded to the time points nearest maximum strain amplitude  $\frac{\Delta L}{L_0}$ ,  $.5 * \frac{\Delta L}{L_0}$ ,  $-.5 * \frac{\Delta L}{L_0}$ , minimum strain amplitude  $\frac{\Delta L}{L_0}$ , and 0% strain, respectively, where  $T = 120$  ms is the cycle period. Boxplots show the median spacing as well as 25<sup>th</sup> and 75<sup>th</sup> percentiles. Sample size  $n$  was: 5 for muscle 178 passive, 6 for muscle 178 active, 8 for muscle 179 active and passive.

### 152 Lattice spacing dynamics correlate to changes in work

153 Given the lattice spacing difference between muscle 178 and 179, we next tested whether these  
 154 changes correlated to the timing of stress differences in the two muscle's dynamic behavior. We  
 155 could not exactly prepare the muscles in the same ways as in the experiments from *Ahn et al. (2006)*  
 156 where the muscle was left *in situ* in the limb and the motor neuron directly stimulated. To restrict  
 157 x-ray imaging to a single muscle, work loop preparations in the beamline required isolating the  
 158 muscles from the cockroach leg and directly stimulating them with silver wire electrodes (*Sponberg*  
 159 *et al., 2011a*). When extracellularly stimulating, muscle force rise times are sooner (estimated at 8  
 160 ms) because of the lack of transmission and synaptic delays and fall off sooner, likely because all  
 161 sarcomeres are simultaneously activated (*Sponberg et al., 2011a*). Consequently, under identical  
 162 8 Hz running conditions, force develops sooner in our muscle preparations than in the neural  
 163 stimulation, *in situ* work loops of *Ahn et al. (2006)*. As a result, under extracellular stimulation both  
 164 muscles 178 and 179 produce small but significant positive work and more negative work (Table  
 165 1). In prior experiments, faster locomotor trials at 11 Hz were observed and implemented in work  
 166 loops (*Sponberg et al., 2011a*). In muscle 137, the midleg equivalent of 179 these 11 Hz conditions  
 167 with extracellular stimulation gave more similar performance to the *Ahn et al. (2006)* and *Full et al.*  
 168 *(1998)* conditions. The faster frequency reduced stride period correspondingly. To compare with  
 169 these conditions, we repeated all of our trials under 11 Hz work loops. In this case, we found



170 results more consistent with previous work loops. Muscle 178 produced positive work statistically  
 171 indistinguishable from the 8 Hz condition ( $p = .56$ ,  $t$ -test), but muscle 179 produced significantly less  
 172 ( $p = .017$ ,  $t$ -test) and both muscles produced even more negative work than in the 8 Hz conditions  
 173 ( $p = .07$  and  $p = .002$ ,  $t$ -test, for muscles 178 and 179, respectively). The differences between the two  
 174 muscles that we observed are not as dramatic as those from the *in situ* work loops, likely because  
 175 of the preparation differences. However, negative work also has large variation (50-75%) from  
 176 experiment to experiment in both our experiments and previous studies at these conditions (Ahn  
 177 *et al.*, 2006; Sponberg *et al.*, 2011a).

178 Given the variation, we considered the correlations between lattice spacing and stress in every  
 179 individual trial from both the 8 Hz and 11 Hz work loops. We paired active and passive work loop  
 180 conditions for each individual and first tested if the difference in lattice spacing due to activation,  
 181  $\Delta d_{10} = d_{10, active} - d_{10, passive}$ , was periodic at the underlying work loop frequency (8 or 11 Hz). We  
 182 detrended and took the Fourier transform of  $\Delta d_{10}$  for each individual experiment. We calculated  
 183 the phase and power spectrum for each. In all cases there was significant power in  $\Delta d_{10}$  at the work  
 184 loop frequency, although in some trials there was also signal at the harmonics. Under the 8 Hz work  
 185 loop conditions, from the Fourier series, we determined the average phase shift between stress  
 186 (active - passive) and  $\Delta d_{10}$  to be  $-12.3 \pm 17.3$  ms for muscle 178 and  $-22.3 \pm 14.1$  ms for muscle 179  
 187 (mean  $\pm$  95% CI of the mean) with a negative phase shift indicating stress precedes  $\Delta d_{10}$ . A phase  
 188 shift makes sense given that the lattice spacing change on top of that due to passive axial strain,  
 189 likely arises from the myosin crossbridges producing radial force. The phase was not significantly  
 190 different between the two muscles. Under the 11 Hz conditions, we found a significant ( $p = .02$ ,  
 191  $t$ -test) difference between the average phase shift between stress and  $d_{10}$  to be  $-16.3 \pm 34.5$  ms for  
 192 muscle 178 and  $25.6 \pm 11.7$  ms for muscle 179.

193 To align the stress, we shifted the  $\Delta d_{10}$  to the frame closest to the average phase measured in  
 194 the power spectra. In all 8 Hz and 11 Hz trials, changes in lattice spacing from passive to active  
 195 work loop conditions correlated with stress. Figure 5 shows a representative time series of  $\Delta d_{10}$ ,  
 196 stress, and incremental work for muscle 178 and 179 at 8 Hz. Peak  $\Delta d_{10}$  under the 8 Hz conditions  
 197 in muscle 178 was larger than in 179. Muscle 178's increased lattice spacing change corresponded  
 198 with a plateau in stress, compared to the stress in muscle 179 which rises rapidly and falls.

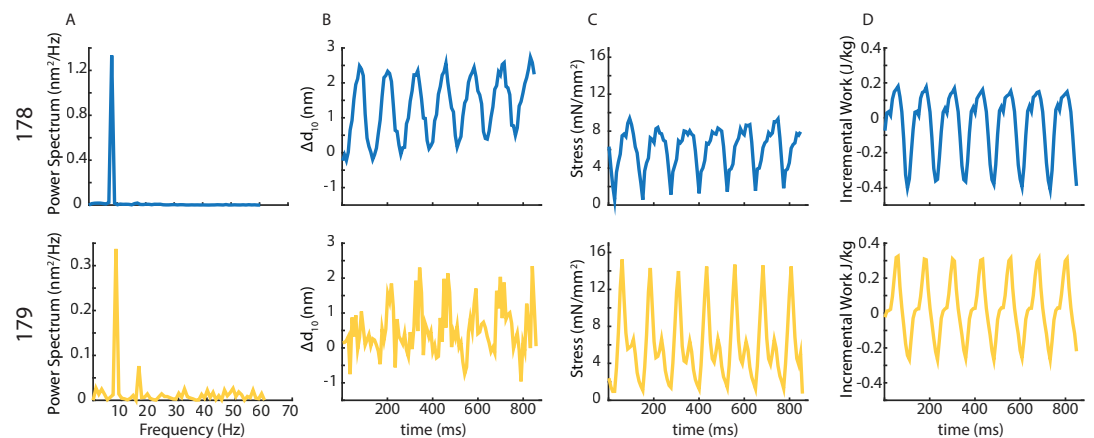

**Figure 5.** A) We calculated the Fourier series for  $\Delta d_{10}$  for each trial and found significant power in the work loop frequency. Some trials showed power at higher harmonics as well. B)  $\Delta d_{10}$  and C) stress correlated with a phase shift. In this case muscle 178 had a Pearson correlation coefficient,  $r = -.30$  ( $p = .002$ ) and muscle 179 had  $r = -.31$  ( $p = .0009$ ). D) Incremental work calculated as  $\sigma_{a-p}(t)\Delta\epsilon(t) = W_{inc}(t)$ , where  $\sigma_{a-p}(t)$  represents active - passive stress. For the 8 Hz conditions,  $n=5$  for muscle 178, and  $n=7$  for muscle 179. For the 11 Hz conditions,  $n=4$  for muscle 178, and  $n=6$  for muscle 179.



|       |                                                          | Muscle 178     |                | Muscle 179     |                |
|-------|----------------------------------------------------------|----------------|----------------|----------------|----------------|
| 8 Hz  | Work per cycle (active) (J/Kg)                           | Total positive | Total negative | Total positive | Total negative |
|       |                                                          | 0.35 ± 0.11    | -1.23 ± 0.30   | 0.67 ± 0.31    | -1.27 ± 0.35   |
| 11 Hz | Work per cycle (active) (J/Kg)                           | Total positive | Total negative | Total positive | Total negative |
|       |                                                          | 0.46 ± 0.25    | -2.95 ± 1.54   | 0.25 ± 0.12    | -3.74 ± 1.08   |
|       | Length (mm)                                              | 3.59 ± 0.20    |                | 3.78 ± 0.15    |                |
|       | Width (mm)                                               | 2.17 ± 0.28    |                | 1.69 ± 0.27    |                |
|       | Stress (mN/mm <sup>2</sup> ) at<br>-10%, -5%, 0, 5%, 10% | 50.9 ± 20.5    |                | 60.1 ± 35.4    |                |
|       |                                                          | 78.8 ± 29.2    |                | 89.7 ± 35.9    |                |
|       |                                                          | 101.6 ± 18.8   |                | 158.5 ± 22.2   |                |
|       |                                                          | 124.0 ± 24.0   |                | 166.3 ± 34.8   |                |
|       |                                                          | 129.2 ± 27.8   |                | 190.4 ± 40.7   |                |

**Table 1.** All values are means ±95% confidence intervals of the mean. For the 8 Hz conditions, n=6 for muscle 178, and n=7 for muscle 179. For the 11 Hz conditions, n=4 for muscle 178, and n=9 for muscle 179.

### 199 Lattice spacing dynamics depend on strain offset

200 Under perturbed conditions during locomotion these muscles can undergo many different patterns  
 201 of strain. We next changed mean strain offset to test if changes in mean strain had a large effect  
 202 on the lattice spacing dynamics during the work loops. A homologous muscle to 179 has a large  
 203 functional range, shifting from a brake to a motor under different activation and strain conditions  
 204 (*Sponberg et al., 2011a*). If lattice spacing covaries with work, we would expect large variation in  
 205 lattice spacing dynamics under different strain conditions.

206 The difference in lattice spacing dynamics between the two muscles was present at every strain  
 207 condition. The peak-to-peak amplitude of  $d_{10}$  in muscle 178 always increased during activated work  
 208 loops compared to passive conditions (figure 7). This change was larger than the  $\Delta d_{10}$  for muscle  
 209 179 in every case except at -5%, where  $d_{10}$  decreased in muscle 179. However, muscle 179 showed  
 210 a much greater sensitivity to mean strain. In many cases the lattice spacing was actually reduced  
 211 when the muscle was activated, indicating that myosin activation constrained the radial expansion  
 212 of the lattice.

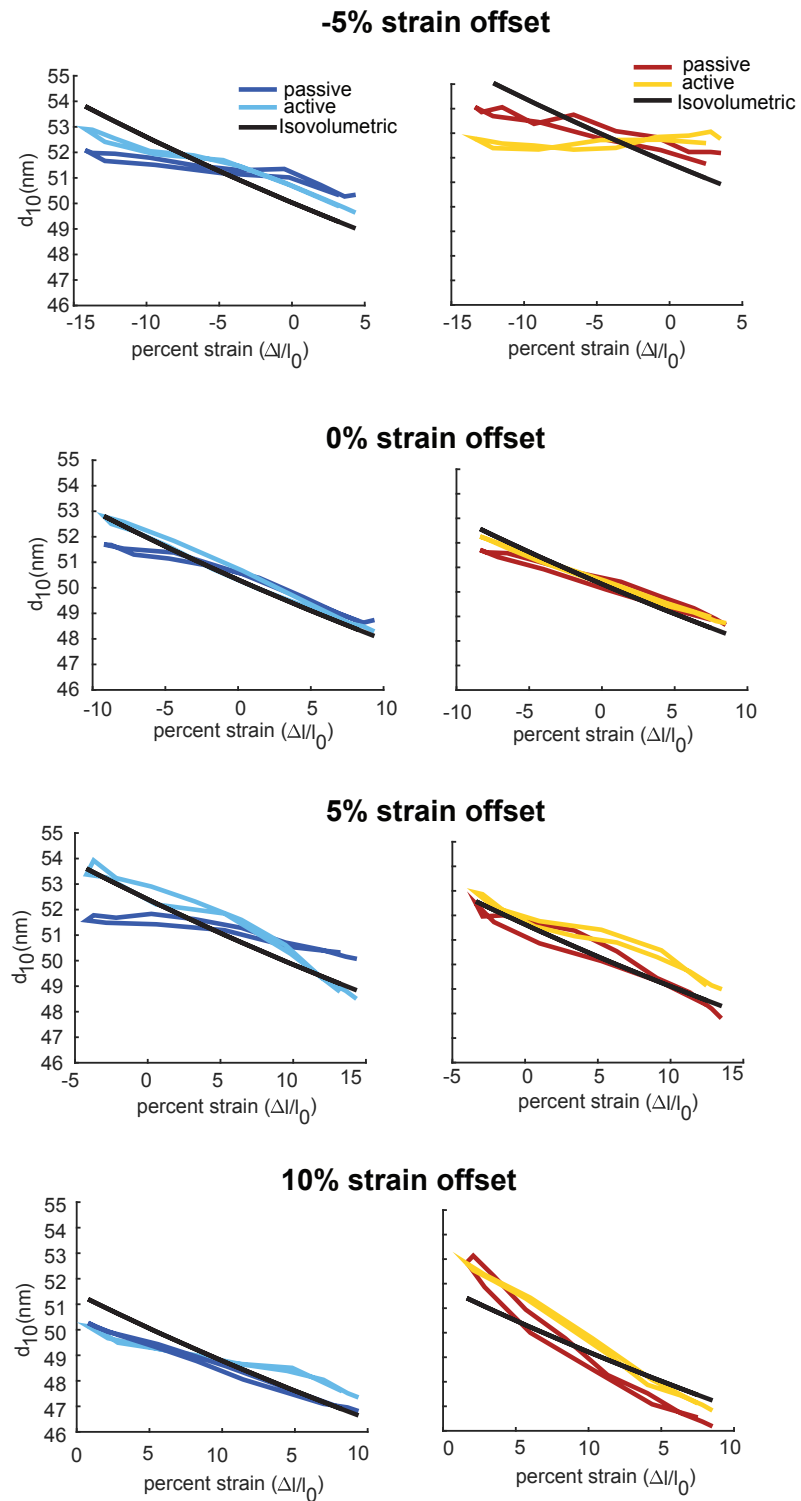

**Figure 6.** Mean lattice loops (strain vs.  $d_{10}$ ) at strain offsets of -5%, +0%, +5%, +10% (top to bottom) for muscles 178 and 179 (left and right). The lattice spacing change in passive conditions is due solely to the axial strain of the myofilament lattice during compression and tension. Under activated conditions the spacing patterns change due to the action of active myosin binding. Sample size  $n$  for strain conditions (-5,0,5,10) was: passive muscle 178,  $n=5$  for all strains; active muscle 178,  $n=(5,6,5,5)$ ; passive and active muscle 179,  $n=(5,8,8,5)$ .

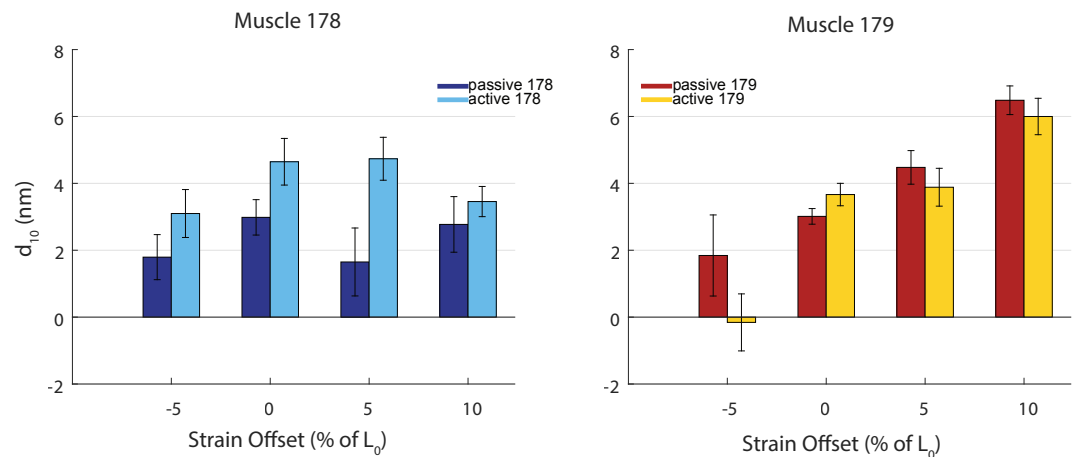

**Figure 7.** Mean change in lattice spacing from start of shortening to end of shortening with 95% confidence of the mean for muscles 178 (left) and 179 (right) during passive and active work loops. We found that strain greatly affected lattice spacing for muscle 179 ( $p < .001$ ), but not for muscle 178 ( $p = .43$ ). In contrast, we found activation greatly affected muscle 178 ( $p = .007$ ) but did not significantly affect muscle 179 ( $p = .24$ ). Statistics were calculated by 2-factor ANOVA. See Figure 6 for sample sizes.

## Discussion

213 A single nanometer difference in the myofilament lattice of two otherwise identical muscles can  
 214 account for one of the muscles acting like a brake, while the other produces more positive me-  
 215 chanical work. Before activation,  $d_{10}$  in muscle 178 has a smaller lattice spacing than muscle 179  
 216 by approximately 1 nm at 10% strain, which is where activation occurs *in vivo* (figure 8). Simply  
 217 showing that there is a passive lattice spacing difference is insufficient to explain the two muscles'  
 218 different work production because under steady state (isometric and isotonic) conditions, these  
 219 two muscles produce the same force. However, the 1 nm lattice spacing difference disappears  
 220 during isometric twitches, consistent with the identical steady state macroscopic properties. Once  
 221 stimulated identically and held isometrically as in *Ahn et al. (2006)*, 178 pushes the lattice further  
 222 apart, whereas muscle 179 is already at its steady state lattice spacing (see figure 8, green dotted  
 223 lines).  
 224

225 The consequence of this lattice spacing difference that disappears under active isometric  
 226 conditions is that muscle 178 undergoes a 0.82 nm larger change in lattice spacing during periodic  
 227 contractions compared to muscle 179 (figure 8). Since the amount of force that is generated axially  
 228 is dependent on the lattice spacing, as is the crossbridge binding probability *Schoenberg (1980)*;  
 229 *Williams et al. (2010)*, this increased change in lattice spacing can have functional consequences.  
 230 Even though constraints on doing work loops within the x-ray beamline required different methods  
 231 of stimulation and muscle preparation, changes in lattice spacing correlate with changes in work  
 232 production in both muscles 178 and 179. The increased transient change in 178's  $d_{10}$  after activation  
 233 corresponds to the plateau in stress development during this portion of the contraction cycle.  
 234 We cannot currently manipulate lattice spacing within intact muscle independent of cross bridge  
 235 activity to causally connect to muscle function. However, our results can explain both the dynamic  
 236 differences and the steady state similarities of these two cockroach muscles.

237 The coupling of lattice spacing and muscle stress production is complicated because the coupling  
 238 of lattice to work happens across the hierarchy of muscle organization, and it is not understood  
 239 how one length scale couples to another. Spatially explicit models have shown that lattice spacing  
 240 can affect force, but these models cannot yet predict work under dynamic conditions for a full  
 241 3-D lattice (*Williams et al., 2010; Tanner et al., 2007*). Other detailed half-sarcomere models can  
 242 capture work differences but cannot yet explicitly incorporate myofilament lattice differences (e.g.  
 243 *Campbell et al. (2011b,a)*). While we cannot yet predict the differences in work, our results link

244 nanometer scale structural differences with functional differences relevant for locomotion.

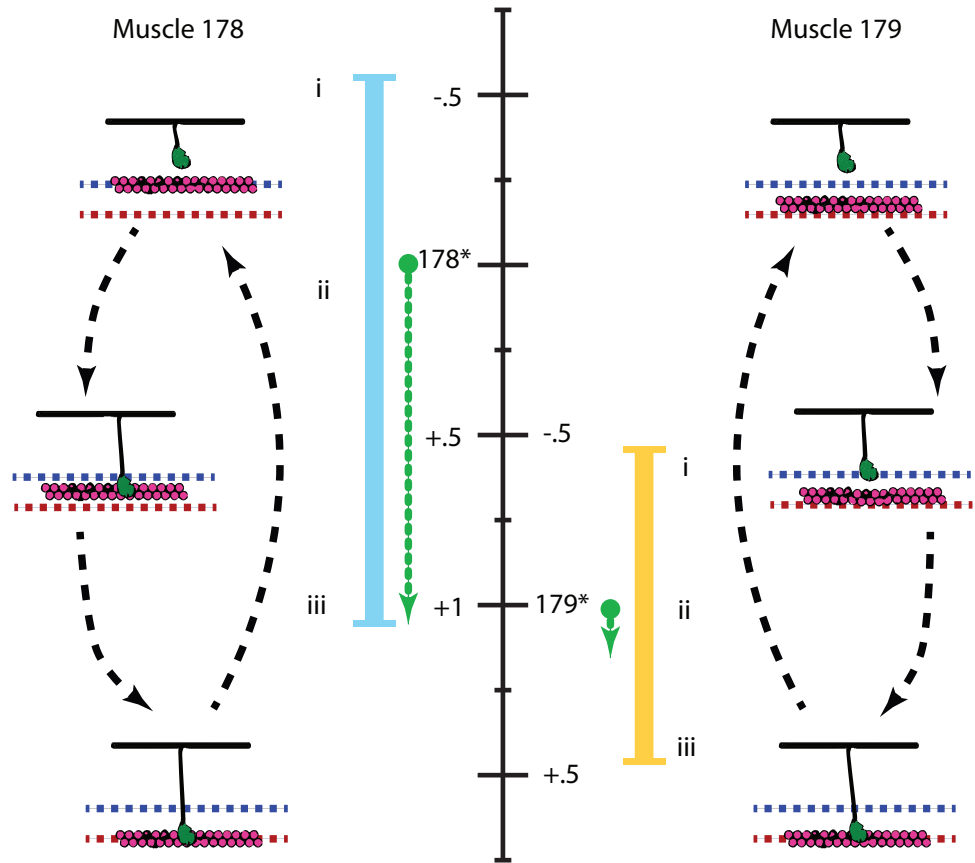

**Figure 8.** Black dashed arrows illustrate the crossbridge and lattice spacing states during activation. The black scale (in nm) shows the range of lattice spacing change for both muscles, with their values at rest indicated by (\*), and centered around muscle 178's rest value. Under isometric conditions, the lattice spacing in muscle 178 increases while muscle 179's does not, leaving them at the same lattice spacing at peak activation (green dashed lines). During passive, unactivated work loops, lattice spacing changes due to axial strain (Figure 4). We subtracted that passive cycling off to show the difference in lattice spacing due solely to activation of muscle during workloops,  $\Delta d_{10}$  (solid blue and yellow lines). The timing of activation was near the start of shortening (i). Before this time the muscles are unactivated, offset by 1 nm, and muscle 178 has a 1 nm tighter lattice spacing denoted by the dashed blue line. During early shortening (ii) muscle 178 produces more positive work, likely because it is in a more favorable position for myosin heads to bind, and undergoes a larger transient in lattice spacing change. By the end of shortening (iii) and into lengthening, the myosin heads have bound and pushed the thin filaments (pink) out to the steady state value (red dashed line). This expansion is greater in muscle 178. So for both steady state (peak activation during isometric conditions) and dynamic (whole work loop), muscle 179's lattice spacing is greater, but more constrained, while muscle 178's is smaller but undergoes a greater range of lattice spacing change. These differences in lattice spacing can account for the similarities in their steady state macro-scale properties (dashed green lines end at the same point) as well as the difference in their mechanical work production (blue and yellow lines are different).

245 **Packing structure cannot account for the differences in these two muscles**

246 Because no statistically significant difference was found in the measurements we took of  $\frac{I_{20}}{I_{11}}$  for the  
 247 two muscles, we determined the two muscles to have the same ratio and arrangement of myosin  
 248 to actin filaments. Since the muscles are both femoral extensors acting at the same joint, it might  
 249 seem natural to assume from the beginning that they have the same packing structure. However,  
 250 even though *B. discoidalis* is flightless, electron micrographs have shown that the largest of the  
 251 femoral extensors in the middle leg which is in between the homologs of these two muscles actually

252 has flight muscle packing arrangement (*Jahromi and Atwood, 1969*). This is presumably because  
253 this muscle is bifunctional and also actuates the wings (*Carbonell, 1947*). It has also been shown  
254 that wing actuation muscles in the beetle *Mecynorrhina torquata* which act as steering muscles have  
255 limb muscle architecture (*Shimomura et al., 2016*). So it is not always possible to assume a given  
256 packing geometry based only on muscle function.

257 Although the packing pattern of these two cockroach muscles does not explain their work loop  
258 differences, it is still an open question how different packing structures might affect muscle function  
259 and energetic versatility. Structure indeed does seem to be related to function. In vertebrate  
260 muscle (human gastrocnemius (*Widrick et al., 2001*), rabbit psoas (*Hawkins and Bennett, 1995*),  
261 frog sartorius (*Luther and Squire, 2014*), all seen by electron microscopy, and others (*Millman, 1998*;  
262 *Squire et al., 2005*)) actin is arranged such that one actin is located equidistant from 3 myosin,  
263 which makes a 1:2 myosin:actin ratio per unit cell. Invertebrate muscle actin packing can vary  
264 greatly, with even adjacent muscles in the same animal having different actin arrangement. Flight  
265 muscle (*Drosophila* (*Irving, 2006*), *Lethocerus cordofanus* (*Miller and Tregear, 1970*)), for example has  
266 one actin located equidistant between every 2 myosin, which makes a 1:3 myosin:actin ratio per  
267 unit cell, whereas invertebrate limb muscle (crab leg muscle (*Yagi and Matsubara, 1977*), crayfish  
268 leg (*April et al., 1971*)) has 12 actin filaments surrounding each myosin, which makes which makes  
269 a 1:6 myosin:actin ratio per unit cell. Different packing structures will have different actin-myosin  
270 spacing even if  $d_{10}$  is the same between muscles since the geometry of actin relative to myosin  
271 has changed but myosin geometry has not (*Millman, 1998*). Different ratios will also affect the  
272 availability of actin binding sites for myosin heads. The broad interspecific correlation with muscle  
273 locomotor type suggests that packing structure may still be an important determinant of work, just  
274 not in the two cockroach muscles considered here.

### 275 **Structural differences at the micro-scale can explain functional differences at the** 276 **macro-scale**

277 It is perhaps surprising that a 1 nm spacing difference could have such a dramatic functional  
278 consequence. Even when we consider the change relative to the absolute lattice spacing of  $\approx 50$   
279 nm, it is only a 2% difference (figure 3). However small differences in myofilament configuration  
280 can have dramatic effects because of the sensitivity of myosin's spatial orientation relative to its  
281 binding site on the thin filament. Crossbridge kinetics depend on lattice spacing and vice versa  
282 (*Schoenberg, 1980; Adhikari et al., 2004; Tanner et al., 2007; Williams et al., 2013*). By undergoing  
283 a larger range of lattice spacing during a typical contraction, muscle 178's crossbridge kinetics will  
284 change more than 179's crossbridge kinetics.

285 It is not unprecedented for lattice spacing changes to have multiscale physiological conse-  
286 quences. Temperature has been shown to affect crossbridge activity enough to change  $d_{10}$  by  
287 as much as 1 nm in hawk moth flight muscle (*George et al., 2013*). In that case the temperature  
288 difference also corresponds to a functional difference where the cooler superficial part of the  
289 muscle acts like a spring while the warmer interior does net positive work. In the cockroach muscles  
290 there is unlikely to be any temperature difference because both muscles are small and superficial.  
291 While the origin of the lattice spacing differences in these muscles is unknown, it is reasonable that  
292 a 1 nm difference in lattice spacing could influence crossbridge activity enough to make a sizable  
293 change in work output.

294 The importance of a 1 nm difference in lattice spacing reflects the more general feature of  
295 muscle's multiscale nature. Multiscale effects manifest when there is coupling between different  
296 length scales and when physiological properties arise which are not predicted by the behavior  
297 of other length scales. As myosin crossbridges form, lattice spacing can change due to the ra-  
298 dial forces generated, aiding or impeding further crossbridge attachment (*Williams et al., 2010*).  
299 Also, crossbridge formation strains myosin thick filaments axially, which can influence myosin  
300 cooperativity (*Tanner et al., 2007*). This means crossbridges (10's of nanometer scale) influence  
301 and are influenced by the arrangement and strain on the whole sarcomere (micron scale). The

302 deformation of the sarcomere is also a product of strain imposed on the whole muscle fiber (100s  
303 of microns), which introduces coupling between whole muscle dynamics and crossbridge kinetics.  
304 As an example of physiological effects emerging at different scales, we generally cannot yet predict  
305 mechanical work from steady-state physiological properties, especially during perturbed conditions.

### 306 **How might different time courses of lattice spacing arise?**

307 Lattice spacing changes are variable across different muscles. In frog muscles the lattice is isovol-  
308 umetric as rest (*Matsubara and Elliot, 1972*) and in active indirect flight muscle lattice change is  
309 minimal (*Irving and Maughan, 2000*). However, our results show that under some strain conditions  
310 (see Figure 6, 0 and +5% strain offset in muscle 178) even passive muscle is not strictly isovolumetric,  
311 and that the lattice spacing increase after activation can make muscles more isovolumetric. This  
312 indicates that individual muscles might have different dependencies on length change as well as  
313 activation, as we see in Figure 7.

314 Many experiments have shown that the relationship between sarcomere length and lattice  
315 spacing may be regulated by titin (*Fuchs and Martyn, 2005*). For example, by enzymatically lowering  
316 the passive tension of titin in mice, it was seen that lattice spacing increased and pCa sensitivity  
317 decreased, implying there exists a strong radial component of titin force which influences actin-  
318 myosin interaction possibly by regulating the lattice structure (*Cazorla et al., 2001*). Bovine left  
319 ventricles and left aortas express higher and lower titin stiffness, respectively. Ca<sup>2+</sup> sensitivity with  
320 sarcomere length is much stronger in the ventricle with stiffer titin, and this is coupled with smaller  
321 lattice spacing, as seen with x-ray diffraction (*Fukuda et al., 2003*). In the muscles in our study,  
322 lattice spacing differences might be explained by differences in projectin or sallimus, the titin-like  
323 proteins found in insects *Yuan et al. (2015)*. Muscle 179 having stiffer titin-like proteins would be  
324 consistent with these previous results because in that muscle the myofilament lattice spacing has a  
325 greater dependence on length (Figure 7).

326 The offset in filament spacing between the two muscles could also arise from differences in  
327 Z disk proteins, like  $\alpha$ -actinin, which cross-link actin (*Hooper and Thuma, 2005*). While this could  
328 account for the passive offset it is less clear how such structural differences in the anchoring of  
329 actin alone could also explain why the  $d_{10}$  difference between the two muscle disappears under  
330 steady state activation.

### 331 **Structural elements of the actin-myosin lattice have implications for understand-** 332 **ing control**

333 In addition to similar muscles producing different amounts of mechanical work under comparable  
334 conditions, the same muscle can also have a great deal of functional variation. How lattice spacing  
335 interplays with macroscopic force production might contribute to the how a muscle changes  
336 function under perturbed conditions. The way a muscle's lattice spacing changes during periodic  
337 contractions at different strains give clues to how muscles can achieve such versatile functions.  
338 Comparing the lattice loops of passive 178 and 179 in Figure 6, muscle 179's lattice spacing has  
339 a more sensitive dependence on strain, and a smaller dependence on activation compared to  
340 muscle 178 (Figure 7). On flat terrain while running this muscle's *in vivo* function is to act as a brake.  
341 However when perturbed, it can perform large amounts of positive work which can affect center of  
342 mass behavior of the whole insect. In muscle 137, the mid-limb analogue of muscle 179, a large  
343 change in function can arise from small changes in strain and phase of activation which arise from  
344 either neural or mechanical feedback (*Sponberg et al., 2011b,a*). By having lattice spacings with  
345 different dependencies on muscle length and activation, different muscles may be able achieve  
346 large functional variation such as muscle 137, or be robust in their function even as activation  
347 changes.

## 348 **Conclusion**

349 A 1 nm difference in the spacing of the myofilament lattice is the first feature that can account  
350 for the functional difference of two nearly identical leg muscles in the cockroach. Nanometer  
351 differences in lattice spacing not only influence myosin binding, but may explain categorical shifts in  
352 muscle function that have effects at the scale of locomotion. A single nanometer change in spacing  
353 can have this profound effect because of the multiscale coupling from the molecular lattice to  
354 the tissue. Simultaneous time resolved x-ray diffraction and physiological mechanism are starting  
355 to link biophysical differences in muscle structure to macroscopic function even under dynamic  
356 conditions.

## 357 **Methods and Materials**

### 358 **Animals**

359 *Blaberus discoidalis* were maintained in a colony at Georgia Tech under a 12:12 light dark cycle and  
360 provided food *ad libitum*. Muscles 178 and 179 are located on the mediodorsal and medioventral  
361 sides of the coxa respectively (Ahn *et al.*, 2006). After removing the whole hind-limb, the leg was  
362 pinned such that the femur formed a 90° angle with the axis of contraction for 178 and 179 with  
363 either dorsal or ventral side facing up. After removing enough exoskeleton to view the muscle of  
364 interest, its rest length (RL) was measured from a characteristic colored spot on the apodeme to  
365 the anterior side of the coxa where the muscle originates (Full *et al.*, 1998). We also measured  
366 the width of the muscle at mid-length. Once dissected from the coxa, the muscle was mounted  
367 between a dual-mode muscle lever (model 305C, Aurora Scientific, Aurora, Canada) and a rigid  
368 hook, and length was set to 104.4% RL for muscle 178 and 105% for muscle 179 - this defined the  
369 operating length (OL) of the muscle, or the mean length during *in vivo* running (Ahn *et al.*, 2006;  
370 Ahn and Full, 2002). Silver wire electrode leads were placed at opposite ends of the muscle for  
371 extra-cellular activation as in (Sponberg *et al.*, 2011a).

### 372 **Time Resolved x-ray Diffraction**

373 Small angle X-ray diffraction was done using the Biophysics Collaborative Access team (BioCat)  
374 small angle diffraction instrument on Beamline 18ID at the Advanced Photon Source (APS), Argonne  
375 National Laboratory. The beam dimensions at the focus were 60 x 150  $\mu\text{m}$ , vertically and horizontally  
376 respectively with a wavelength of .103 nm (12 keV). Initial beam intensity is  $10^{13}$  photons/s, which we  
377 attenuated with 12 sheets of 20  $\mu\text{m}$  thick aluminum, about a 65% reduction. For all cases, diffraction  
378 images were recorded on a Pilatus 3 1M pixel array detector (Dectris Inc) with an exposure time of 4  
379 ms with a 4 ms period between images during which a fast shutter was closed to reduce radiation  
380 damage.

### 381 **Experimental Protocol**

382 After being extracted and mounted, muscles were placed in the beam-line and activated with a  
383 twitch consisting of 3 spikes separated by 10 ms, with the first occurring at  $t = 0$  ms. Diffraction  
384 images we collected starting from  $t = -25$  ms and ending at  $t = 175$  ms. One twitch was done at  
385 strain offsets of -10, -5, 0, +5, +10% OL each for both muscles. We estimated cross-sectional area  
386 from the diameter of the muscle assuming a cylindrical shape, and used this to calculate stress.  
387 From this we obtained the lattice spacing  $d_{10}$  during the whole twitch.

388 Next, we did work loops under several conditions. First, strain amplitude (peak to peak) was  
389 18.5% of OL for muscle 178 and 16.4% of OL for muscle 179, with different strain amplitudes  
390 accounting for different absolute lengths. The driving frequency was 8 Hz, with activation consisting  
391 of 3 spikes at 6 volts at 100 Hz, at a phase of activation of .08%, with 0 defined as the start of  
392 shortening. These are the *in vivo* conditions of these muscles during running (Full *et al.*, 1998;  
393 Ahn *et al.*, 2006), except with the muscle isolated and extracellularly stimulated. We also did work  
394 loops at 11 Hz with the same activation, which matches the conditions from Sponberg *et al.* (2011a)



395 including the same method of stimulation. We then performed the same work loop but with strain  
396 offsets of -10, -5, 0, +5, +10 percent OL, and did passive work loops for every active work loop.  
397 Each work loop trial consisted of 8 cycles, and we discarded the first cycle. Muscle stress was  
398 calculated using the average mass values from (Ahn et al., 2006) and the measured resting lengths  
399 because these measurements produced less variation than attempts to measure mass following  
400 x-ray experiments. During our limited beam time we had 17 total samples.

### 401 Analysis

402 The most prominent peaks in the muscle diffraction patterns are the (1,0), (1,1), (2,0) peaks, all of  
403 which correspond to planes in the muscle crystal lattice (see Figure 1 C and E). Since the intensity  
404 is related to the mass which lies along the associated plane, we can use the (1,1) and (2,0) peaks  
405 to determine the arrangement of actin in the lattice. If more mass is located along the (1,1) plane,  
406 as in vertebrate muscle, the (1,1) peak will be much brighter than the (2,0) peak, and  $\frac{I_{11}}{I_{20}} \gg 1$ . In  
407 invertebrate flight muscle, more mass is aligned with the (2,0), which will mean the (2,0) peak is  
408 brighter than the (1,1):  $\frac{I_{11}}{I_{20}} \ll 1$  (Irving, 2006). The spacing between two peaks gives the spacing  
409 between the corresponding planes in the lattice via Bragg's Law, so we can use the (1,0) peaks to  
410 determine the lattice spacing  $d_{10}$ .

411 X-ray diffraction patterns were analyzed by automated software (Williams et al., 2015), a subset  
412 of which was verified by hand fitting with *fityk*, a curve fitting program (Wojdyr, 2010). Individual  
413 frames for which the automated software failed to resolve peaks were discarded. Trials with frames  
414 that consistently failed during multiple cycles to resolve peaks were discarded totally.

### 415 Acknowledgments

416 The authors thank George Steven Chandler and Chidinma Chukwueke for help in data collection and  
417 Sage Maligen, Tom Libby, and Tom Daniel for helpful discussions. This work was supported by grant  
418 W911NF-14-1-0396 from the Army Research Office to SNS, TCI, Tom Daniel and Anette Hosoi. This  
419 research used resources of the Advanced Photon Source, a U.S. Department of Energy (DOE) Office  
420 of Science User Facility operated for the DOE Office of Science by Argonne National Laboratory  
421 under Contract No. DE-AC02-06CH11357. The work was supported by GUP beamtime awards  
422 47291 and 52213. Use of the Pilatus 3 1M detector was provided by grant 1S10OD018090-01 from  
423 NIGMS. This project was also supported by grant 9 P41 GM103622 from the National Institute of  
424 General Medical Sciences of the National Institutes of Health. The content is solely the responsibility  
425 of the authors and does not necessarily reflect the official views of the National Institute of General  
426 Medical Sciences or the National Institutes of Health.

### 427 References

- 428 Adhikari BB, Regnier M, Rivera AJ, Kreutziger KL, Martyn DA. Cardiac Length Dependence of Force and Force  
429 Redevelopment Kinetics with Altered Cross-Bridge Cycling. *Biophysical Journal*. 2004 Sep; 87:1784–1794.
- 430 Ahn AN. How Muscles Function - the Work Loop Technique. *Journal of Experimental Biology*. 2012; 215(7):1051–  
431 1052. doi: [10.1242/jeb.062752](https://doi.org/10.1242/jeb.062752).
- 432 Ahn AN, Full RJ. A motor and a brake: two leg extensor muscles acting at the same joint manage energy  
433 differently in a running insect. *Journal Of Experimental Biology*. 2002; 205(3):379–389.
- 434 Ahn AN, Meijer K, Full RJ. *In situ* muscle power differs without varying *in vitro* mechanical properties in two insect  
435 leg muscles innervated by the same motor neuron. *Journal Of Experimental Biology*. 2006; 209(17):3370–3382.
- 436 April EW, Brandt PW, Elliott GF. The myofilament lattice: Studies on isolated fibers. *The Journal of Cell Biology*.  
437 1971; 51(1):72–82. doi: [10.1083/jcb.51.1.72](https://doi.org/10.1083/jcb.51.1.72).
- 438 Bagni MA, Cecchi G, Griffiths PJ, Maeda Y, Rapp G, Ashley CC. Lattice spacing changes accompanying isometric  
439 tension development in intact single muscle fibers. *Biophys J*. 1994 Nov; 67(5):1965–1975.
- 440 Becht G, Dresden D. Physiology of the Locomotory Muscles in the Cockroach. *Nature*. 1956 jan; 177(4514):836–  
441 837.

- 442 **Becht G**, Hoyle G, Usherwood PNR. Neuromuscular transmission in the coxal muscles of the cockroach. *Journal*  
443 *of Insect Physiology*. 1960 aug; 4(3):191–201. doi: 10.1016/0022-1910(60)90026-3.
- 444 **Campbell SG**, Hatfield C, Campbell KS. A model with Heterogeneous Half-Sarcomeres Exhibits Residual Force  
445 Enhancement After Active Stretch. *Biophysical Journal*. 2011; 100(3):12a. <http://dx.doi.org/10.1016/j.bpj.2010.12.277>,  
446 doi: 10.1016/j.bpj.2010.12.277.
- 447 **Campbell SG**, Hatfield PC, Campbell KS. A Mathematical Model of Muscle Containing Heterogeneous Half-  
448 Sarcomeres Exhibits Residual Force Enhancement. *Plos Computational Biology*. 2011 sep; 7(9):e1002156.  
449 <http://dx.plos.org/10.1371/journal.pcbi.1002156.g008>.
- 450 **Carbonell CS**. The Thoracic Muscles of the Cockroach *Periplaneta Americana* (L.). *Smithsonian Miscellaneous*  
451 *Collections*. 1947 jan; 107(2):1–23.
- 452 **Cazorla O**, Wu Y, Irving T, Granzier H. Titin-Based Modulation of Calcium Sensitivity of Active Tension in Mouse  
453 Skinned Cardiac Myocytes Materials and Methods Preparations and Solutions. *Circulation Research*. 2001;  
454 88(10):1028–1035. doi: 10.1161/hh1001.090876.
- 455 **Cecchi G**, Bagni M, Griffiths P, Ashley C, Maeda Y. Detection of radial crossbridge force by lattice spacing changes  
456 in intact single muscle fibers. *Science*. 1990 Dec; 250:1409–1411.
- 457 **Dickinson MH**, Farley CT, Full RJ, Koehl MA, Kram R, Lehman S. How animals move: an integrative view. *Science*.  
458 2000 Apr; 288(5463):100–106.
- 459 **Fuchs F**, Martyn DA. Length-dependent Ca<sup>2+</sup> activation in cardiac muscle: some remaining questions. *Journal*  
460 *of Muscle Research and Cell Motility*. 2005 Apr; 26:199–212.
- 461 **Fuchs F**, Wang YP. Sarcomere Length Versus Interfilament Spacing as Determinants of Cardiac Myofilament  
462 Ca<sup>2+</sup>Sensitivity and Ca<sup>2+</sup>Binding. *Journal of Molecular and Cellular Cardiology*. 1996; 28(7):1375 – 1383. doi:  
463 <https://doi.org/10.1006/jmcc.1996.0129>.
- 464 **Fukuda N**, Wu Y, Farman G, Irving TC, Granzier H. Titin Isoform Variance and Length Dependence of Activation  
465 in Skinned Bovine Cardiac Muscle. *The Journal of Physiology*. 2003; 553(1):147–154. doi: 10.1113/jphys-  
466 [iol.2003.049759](http://doi.org/10.1113/jphysiol.2003.049759).
- 467 **Full RJ**, Stokes DR, Ahn AN, Josephson RK. Energy absorption during running by leg muscles in a cockroach.  
468 *Journal Of Experimental Biology*. 1998 Apr; 201 (Pt 7):997–1012.
- 469 **George NT**, Irving TC, Williams CD, Daniel TL. The cross-bridge spring: can cool muscles store elastic energy?  
470 *Science*. 2013 Jun; 340(6137):1217–1220.
- 471 **Gordon AM**, Huxley AF, Julian FJ. The variation in isometric tension with sarcomere length in vertebrate muscle  
472 fibres. *The Journal of Physiology*. 1966; 184(1):170–192. doi: 10.1113/jphysiol.1966.sp007909.
- 473 **Hawkins CJ**, Bennett PM. Evaluation of freeze substitution in rabbit skeletal muscle. Comparison of electron  
474 microscopy to X-ray diffraction. *Journal of Muscle Research & Cell Motility*. 1995; 16:303–318.
- 475 **Hooper SL**, Thuma JB. Invertebrate Muscles: Muscle Specific Genes and Proteins. *Physiological reviews*. 2005  
476 jul; 85(3):1001–1060.
- 477 **Huxley AF**, Simmons RM. Proposed Mechanism of Force Generation in Striated Muscle. *Nature*. 1971 Oct;  
478 233:533–538.
- 479 **Irving TC**, Maughan DW. In Vivo X-Ray Diffraction of Indirect Flight Muscle from *Drosophila melanogaster*.  
480 *Biophysics Journal*. 2000 May; 78:2511–2515.
- 481 **Irving TC**. X-ray diffraction of indirect flight muscle from *Drosophila* in vivo. In: Vigoreaux J, editor. *Nature's*  
482 *Versatile Engine: Insect Flight Muscle Inside and Out* Landes Bioscience; 2006.p. 197–211. doi: 10.1007/0-387-  
483 31213-7.
- 484 **Iwamoto H**. Synchrotron radiation x-ray diffraction techniques applied to insect flight muscle. *International*  
485 *Journal of Molecular Sciences*. 2018; 19(6). doi: 10.3390/ijms19061748.
- 486 **Jahromi SS**, Atwood HL. Structural Features of Muscle Fibers in the Cockroach Leg. *Journal of Insect Physiology*.  
487 1969 Jun; 15:2255–2262.
- 488 **Josephson RK**. Mechanical power output from striated-muscle during cyclic contraction. *Journal Of Experimental*  
489 *Biology*. 1985; 114(JAN):493–512.

- 490 **Josephson RK**. Dissecting muscle power output. *Journal Of Experimental Biology*. 1999; 202(23):3369–3375.
- 491 **Luther P**, Squire J. The Intriguing Dual Lattices of the Myosin Filaments in Vertebrate Striated Muscles: Evolution  
492 and Advantage. *Biology*. 2014 12; 3:846–865. doi: 10.3390/biology3040846.
- 493 **Matsubara I**, Elliot GF. X-ray diffraction studies on skinned single fibres of frog skeletal muscle. *Journal of*  
494 *Molecular Biology*. 1972 Dec; 72:957–669.
- 495 **Maughan DW**, Vigoreaux JO. An Integrated View of Insect Flight Muscle: Genes, Motor Molecules, and Motion.  
496 *Physiology*. 1999 jun; 14(3):87–92. doi: 10.1152/physiologyonline.1999.14.3.87.
- 497 **McCulloch AD**. Systems Biophysics: Multiscale Biophysical Modeling of Organ Systems. *Biophysical Journal*.  
498 2016; 110(5):1023–1027. doi: 10.1016/j.bpj.2016.02.007.
- 499 **Miller A**, Tregear RT. Evidence concerning Crossbridge Attachment during Muscle Contraction. . 1970;  
500 226(5250):1060–1061. doi: 10.1038/2261060a0, exported from <https://app.dimensions.ai> on 2019/03/16.
- 501 **Millman B**. The Filament Lattice of Striated Muscle. *Physiological Reviews*. 1998 Apr; 78:359–391.
- 502 **Pearson KG**, Iles JF. Innervation of coxal depressor muscles in the cockroach, *Periplaneta americana*. *Journal of*  
503 *Experimental Biology*. 1971 feb; 54(1):215–232.
- 504 **Roberts TJ**, Marsh RL, Weyland PG, Taylor CR. Muscular Force in Running Turkeys: The Economy of Minimizing  
505 Work. *Science*. 1997 Feb; 275:1113–1114.
- 506 **Schoenberg M**. Geometrical factors influencing muscle force development. II. Radial forces. *Biophysical Journal*.  
507 1980 Apr; 30:69–77.
- 508 **Shimomura T**, Iwamoto H, Vo Doan TT, Ishiwata S, Sato H, Suzuki M. A Beetle Flight Muscle Displays Leg Muscle  
509 Microstructure. *Biophysical Journal*. 2016 09; 111:1295–1303. doi: 10.1016/j.bpj.2016.08.013.
- 510 **Sponberg S**, Libby T, Mullens C, Full R. Shifts in a single muscle's control potential of body dynamics are  
511 determined by mechanical feedback. *Philosophical Transactions of the Royal Society B*. 2011 May; 366:1606–  
512 1620.
- 513 **Sponberg S**, Spence AJ, Mullens CH, Full RJ. A single muscle's multifunctional control potential of body dynamics  
514 for postural control and running. *Philosophical Transactions of the Royal Society B*. 2011 Apr; 366:1592–1605.
- 515 **Squire JM**, Al-khayat HA, Knupp C, Luther PK. Molecular Architecture in Muscle Contractile Assemblies. In:  
516 *Fibrous Proteins: Muscle and Molecular Motors*, vol. 71 of *Advances in Protein Chemistry* Academic Press;  
517 2005.p. 17 – 87. doi: [https://doi.org/10.1016/S0065-3233\(04\)71002-5](https://doi.org/10.1016/S0065-3233(04)71002-5).
- 518 **Tanner BCW**, Daniel TL, Regnier M. Sarcomere lattice geometry influences cooperative myosin binding in  
519 muscle. *Plos Computational Biology*. 2007 jul; 3(7):1195–1211.
- 520 **Tanner BCW**, Farman GP, Irving TC, Maughan DW, Palmer BM, Miller MS. Thick-to-thin filament surface distance  
521 modulates cross-bridge kinetics in *Drosophila* flight muscle. *Biophysical Journal*. 2012 sep; 103(6):1275–1284.  
522 doi: 10.1016/j.bpj.2012.08.014.
- 523 **Widrick JJ**, Romatowski JG, Norenberg KM, Knuth ST, Bain JLW, Riley DA, Trappe SW, Trappe TA, Costill DL, Fitts  
524 RH. Functional properties of slow and fast gastrocnemius muscle fibers after a 17-day spaceflight. *Journal of*  
525 *Applied Physiology*. 2001; 90(6):2203–2211. doi: 10.1152/jappl.2001.90.6.2203.
- 526 **Williams CD**, Regnier M, Daniel TL. Axial and Radial Forces of Crossbridges Depend on Lattice Spacing. *PLOS*  
527 *Computational Biology*. 2010 Dec; 6(e1001018):1–10.
- 528 **Williams CD**, Salcedo MK, Irving TC, Regnier M, Daniel TL. The length-tension curve in muscle depends on lattice  
529 spacing. *Proceedings Biological sciences / The Royal Society*. 2013 Jul; 280(1766):20130697–20130697.
- 530 **Williams CD**, Balazinska M, Daniel TL. Automated Analysis of Muscle X-ray Diffraction Imaging with MCMC. In:  
531 *Biomedical Data Management and Graph Online Querying* Springer; 2015.p. 126–133.
- 532 **Wojdyr M**. Fityk: a general-purpose peak fitting program. *Journal of Applied Crystallography*. 2010 Oct;  
533 43:1126–1128.
- 534 **Yagi N**, Matsubara I. The equatorial X-ray diffraction patterns of crustacean striated muscles. *Journal of*  
535 *Molecular Biology*. 1977; 117(3):797 – 803. doi: [https://doi.org/10.1016/0022-2836\(77\)90070-5](https://doi.org/10.1016/0022-2836(77)90070-5).
- 536 **Yuan CC**, Ma W, Schemmel P, Cheng YS, Liu J, Tsapraillis G, Feldman S, Southgate AA, Irving TC. Elastic proteins  
537 in the flight muscle of *Manduca sexta*. *Archives of Biochemistry and Biophysics*. 2015; 568:16 – 27. doi:  
538 <https://doi.org/10.1016/j.abb.2014.12.033>.
